# Supplementary material for: Cigarette smoke selectively enhances viral PAMP– and virus-induced pulmonary innate immune and remodeling responses in mice
Source: JCI journal article supplement (doi:10.1172/jci32709), 2008-07-01
Supplement: sd1 [file 1]

301 Moved Permanently

# Moved Permanently

The document has moved here.
